# Supplementary material
Source: Royal Society of Chemistry journal article supplement (doi:10.1039/d6rp00114a)
Supplement: d6rp00114a1.pdf [file d6rp00114a1.pdf]

## ARTICLE

**S1. Measurement Invariance Test Results****Perceived teacher support questionnaire**

To examine the structural stability of the perceived teacher support scale across gender groups, single-group confirmatory factor analyses were conducted separately for the male and female samples. In the male sample, the model fit indices were CFI = 0.972, TLI = 0.944, RMSEA = 0.158 (90% CI [0.130, 0.187]), and SRMR = 0.023. In the female sample, the corresponding indices were CFI = 0.975, TLI = 0.950, RMSEA = 0.152 (90% CI [0.125, 0.180]), and SRMR = 0.021. Overall, the fit pattern was highly similar across the two gender groups, suggesting that the scale showed satisfactory structural stability for both male and female students.

Multigroup confirmatory factor analysis was then conducted to test the measurement invariance of the perceived teacher support scale across gender groups. The results indicated that, from the configural invariance model to the metric invariance model, CFI remained unchanged ( $\Delta\text{CFI} = 0.000$ ), whereas RMSEA decreased slightly ( $\Delta\text{RMSEA} = -0.025$ ). From the metric invariance model to the scalar invariance model, CFI again showed no change ( $\Delta\text{CFI} = 0.000$ ), and RMSEA further decreased ( $\Delta\text{RMSEA} = -0.016$ ). Because these changes did not exceed the recommended cutoff criterion ( $\Delta\text{CFI} \leq 0.01$ ), the findings support good measurement invariance of the scale across male and female students.

Table S1. Single-Group Confirmatory Factor Analysis for the perceived teacher support Questionnaire

| Group | CFI   | TLI   | RMSEA [90% CI]       | SRMR  |
|-------|-------|-------|----------------------|-------|
| Man   | 0.972 | 0.944 | 0.158 [0.130, 0.187] | 0.023 |
| Woman | 0.975 | 0.95  | 0.152 [0.125, 0.180] | 0.021 |

Table S2. Gender Measurement Invariance Test for the perceived teacher support Questionnaire

| Model          | $\chi^2$ | df | CFI   | TLI   | RMSEA [90% CI]       | SRMR  | $\Delta\text{CFI}$ | $\Delta\text{RMSEA}$ |
|----------------|----------|----|-------|-------|----------------------|-------|--------------------|----------------------|
| M1: Configural | 181.13   | 10 | 0.974 | 0.947 | 0.155 [0.135, 0.175] | 0.019 | —                  | —                    |
| M2: Metric     | 182.52   | 14 | 0.974 | 0.963 | 0.130 [0.113, 0.147] | 0.021 | 0                  | -0.025               |
| M3: Scalar     | 185.14   | 18 | 0.974 | 0.971 | 0.114 [0.099, 0.129] | 0.021 | 0                  | -0.016               |

**Chemistry self-efficacy questionnaire**

First, single-group confirmatory factor analyses were conducted separately for the male and female samples to examine the factor structure of the chemistry self-efficacy scale. The results showed that, in the male sample, the model fit indices were CFI = 0.991, TLI = 0.981, RMSEA = 0.089 (90% CI [0.061, 0.119]), and SRMR = 0.014. In the female sample, the corresponding fit indices were CFI = 0.974, TLI = 0.947, RMSEA = 0.150 (90% CI [0.123, 0.178]), and SRMR = 0.022. Overall, the CFI and TLI values in both groups exceeded 0.90, and the SRMR values were below 0.08, indicating that the scale showed acceptable model fit across gender groups and could therefore be subjected to further multigroup measurement invariance testing.

Subsequently, to examine the measurement invariance of the chemistry self-efficacy scale across gender groups, configural invariance, metric invariance, and scalar invariance models were tested sequentially. The results indicated that all three models demonstrated acceptable fit. Further comparisons of changes in fit indices showed that, from the configural invariance model to the metric invariance model,  $\Delta\text{CFI} = -0.001$  and  $\Delta\text{RMSEA} = -0.016$ ; from the metric invariance model to the scalar invariance model,  $\Delta\text{CFI} = -0.002$  and  $\Delta\text{RMSEA} = -0.009$ . According to the criteria proposed by Chen (2007), namely that  $\Delta\text{CFI}$  should not be lower than -0.01 and  $\Delta\text{RMSEA}$  should not exceed 0.015, these findings support good measurement invariance of the scale across gender groups.

Table S3. Single-Group Confirmatory Factor Analysis for the chemistry self- efficacy Questionnaire

| Group  | CFI   | TLI   | RMSEA [90% CI]       | SRMR  |
|--------|-------|-------|----------------------|-------|
| Male   | 0.991 | 0.981 | 0.089 [0.061, 0.119] | 0.014 |
| Female | 0.974 | 0.947 | 0.150 [0.123, 0.178] | 0.022 |

Table S4. Gender Measurement Invariance Test for the chemistry self- efficacy Questionnaire

| Model          | $\chi^2$ | df | CFI   | TLI   | RMSEA [90% CI]       | SRMR  | $\Delta$ CFI | $\Delta$ RMSEA |
|----------------|----------|----|-------|-------|----------------------|-------|--------------|----------------|
| M1: Configural | 119.523  | 10 | 0.982 | 0.964 | 0.124 [0.104, 0.144] | 0.016 | —            | —              |
| M2: Metric     | 130.154  | 14 | 0.981 | 0.973 | 0.108 [0.091, 0.125] | 0.028 | -0.001       | -0.016         |
| M3: Scalar     | 143.746  | 18 | 0.979 | 0.977 | 0.099 [0.084, 0.114] | 0.031 | -0.002       | -0.009         |

### Chemistry identify questionnaire

Before testing measurement invariance, single-group confirmatory factor analyses were conducted separately for the male and female samples. In the male sample, the model fit indices were CFI = 0.871, TLI = 0.855, RMSEA = 0.086 (90% CI [0.081, 0.090]), and SRMR = 0.063. In the female sample, the corresponding indices were CFI = 0.881, TLI = 0.866, RMSEA = 0.088 (90% CI [0.084, 0.092]), and SRMR = 0.073. Overall, the RMSEA and SRMR values were within acceptable ranges in both groups, supporting further multigroup measurement invariance testing.

Subsequently, configural, metric, and scalar invariance models were tested to examine the measurement invariance of the chemistry identity scale across gender groups. The configural invariance model showed  $\chi^2 = 2867.737$ ,  $df = 448$ , CFI = 0.877, TLI = 0.861, RMSEA = 0.087, and SRMR = 0.065. The metric invariance model showed  $\chi^2 = 2907.113$ ,  $df = 467$ , CFI = 0.876, TLI = 0.865, RMSEA = 0.086, and SRMR = 0.067. The scalar invariance model showed  $\chi^2 = 3008.184$ ,  $df = 486$ , CFI = 0.871, TLI = 0.866, RMSEA = 0.085, and SRMR = 0.069. Further comparisons indicated that, from the configural model to the metric model,  $\Delta$ CFI = -0.001 and  $\Delta$ RMSEA = -0.001, and from the metric model to the scalar model,  $\Delta$ CFI = -0.005 and  $\Delta$ RMSEA = -0.001.

Table S5 Single-Group Confirmatory Factor Analysis for the chemistry identify Questionnaire

| Group  | CFI   | TLI   | RMSEA | RMSEA 90% CI   | SRMR  |
|--------|-------|-------|-------|----------------|-------|
| Male   | 0.871 | 0.855 | 0.086 | [0.081, 0.090] | 0.063 |
| Female | 0.881 | 0.866 | 0.088 | [0.084, 0.092] | 0.073 |

Table S6. Gender Measurement Invariance Test for the chemistry identify Questionnaire

| Model          | $\chi^2$ | df  | CFI   | TLI   | RMSEA [90% CI]       | SRMR  | $\Delta$ CFI | $\Delta$ RMSEA |
|----------------|----------|-----|-------|-------|----------------------|-------|--------------|----------------|
| M1: Configural | 2867.737 | 448 | 0.877 | 0.861 | 0.087 [0.084, 0.090] | 0.065 | —            | —              |
| M2: Metric     | 2907.113 | 467 | 0.876 | 0.865 | 0.086 [0.083, 0.089] | 0.067 | -0.001       | -0.001         |
| M3: Scalar     | 3008.184 | 486 | 0.871 | 0.866 | 0.085 [0.082, 0.088] | 0.069 | -0.005       | -0.001         |

**S2. Standardized Factor Loadings for the Questionnaire**

Table S1 Standardized factor loadings for perceived teacher support questionnaire (N = 1431)

| Item | Standardized factor loading |
|------|-----------------------------|
| TS1  | 0.818                       |
| TS2  | 0.912                       |
| TS3  | 0.912                       |
| TS4  | 0.881                       |
| TS5  | 0.826                       |

Note. All factor loadings exceeded 0.40.

Table S2 Standardized factor loadings for chemistry self- efficacy questionnaire (N = 1431)

| Item | Standardized factor loading |
|------|-----------------------------|
| SE1  | 0.865                       |
| SE2  | 0.792                       |
| SE3  | 0.88                        |
| SE4  | 0.922                       |
| SE5  | 0.866                       |

Note. All factor loadings exceeded 0.40.

Table S3 Standardized factor loadings for the 23 items of each individual factor of the identify questionnaire (N = 1431)

| Dimension                                    | Item | Standardized factor loading |
|----------------------------------------------|------|-----------------------------|
| Chemistry learning competence                | CI1  | 0.627                       |
|                                              | CI2  | 0.801                       |
|                                              | CI3  | 0.816                       |
|                                              | CI4  | 0.759                       |
|                                              | CI5  | 0.673                       |
|                                              | CI6  | 0.757                       |
|                                              | CI7  | 0.482                       |
|                                              | CI8  | 0.631                       |
| Chemistry classroom interest and performance | CI9  | 0.72                        |
|                                              | CI10 | 0.473                       |
|                                              | CI11 | 0.549                       |
|                                              | CI12 | 0.649                       |
|                                              | CI13 | 0.714                       |
|                                              | CI14 | 0.644                       |
|                                              | CI15 | 0.677                       |
| Chemistry career interest                    | CI16 | 0.671                       |
|                                              | CI17 | 0.781                       |
|                                              | CI18 | 0.799                       |
| Chemistry recognition                        | CI19 | 0.764                       |
|                                              | CI20 | 0.836                       |
|                                              | CI21 | 0.911                       |
|                                              | CI22 | 0.867                       |
|                                              | CI23 | 0.911                       |

Note. All factor loadings exceeded 0.40.

### S3. Chinese questionnaire items and corresponding English translations

#### Part 1. Demographic and background information

| No. | 中文题项                                                            | English translation                                                                                                                                                                                                                            | Response options                                                    |
|-----|-----------------------------------------------------------------|------------------------------------------------------------------------------------------------------------------------------------------------------------------------------------------------------------------------------------------------|---------------------------------------------------------------------|
| 1   | 性别                                                              | Gender                                                                                                                                                                                                                                         | Female / Male                                                       |
| 2   | 年级                                                              | Grade level                                                                                                                                                                                                                                    | Grade10/Grade11                                                     |
| 3   | 你最近一次期中化学考试成绩为:                                                 | What was your score in the most recent midterm chemistry examination?                                                                                                                                                                          | Open-ended                                                          |
| 4   | 你目前是否担任班级学生干部(如班长、学习委员、课代表等)?                                   | Do you currently hold a formal class leadership position, such as class monitor, learning committee member, or subject representative?                                                                                                         | Yes/No                                                              |
| 5   | 高中毕业后,你选择化学或与化学密切相关的大学专业(如化学、应用化学、材料化学、化学工程、环境化学、生物化学等)的可能性有多大? | How likely are you to choose chemistry or a chemistry-related university major after high school, such as chemistry, applied chemistry, materials chemistry, chemical engineering, environmental chemistry, or biochemistry?                   | Completely unlikely / Unlikely / Uncertain / Likely / Highly likely |
| 6   | 你是否参加过学校组织的化学或科技相关活动(如科技节、实验竞赛、科技社团、化学探究活动等)?                   | Have you participated in chemistry- or science-and-technology-related activities organized by your school, such as science and technology festivals, experimental competitions, science and technology clubs, or chemistry inquiry activities? | Yes / No                                                            |
| 7   | 父母中是否有人从事与化学或工程技术相关的工作(教师、科研人员、工程师、技术人员、医生、药师等)?                | Is either of your parents engaged in a chemistry- or engineering-related occupation, such as teacher, researcher, engineer, technician, doctor, or pharmacist?                                                                                 | Yes / No                                                            |

#### Part 2. Questionnaire 1: Perceived teacher support

Response scale for all items:

1 = Strongly disagree; 2 = Disagree; 3 = Neutral; 4 = Agree; 5 = Strongly agree.

| Item | 中文题项                  | English translation                                                            |
|------|-----------------------|--------------------------------------------------------------------------------|
| PTS1 | 化学老师会倾听我的想法与感受。       | My chemistry teacher listens to my thoughts and feelings.                      |
| PTS2 | 化学老师会主动关心我的学习情况并给予指导。 | My chemistry teacher actively cares about my learning and provides guidance.   |
| PTS3 | 化学老师会主动关心我的情绪及学习状态。   | My chemistry teacher actively cares about my emotions and learning state.      |
| PTS4 | 当我遇到困难或挫折时,化学老师会鼓励我。  | When I encounter difficulties or setbacks, my chemistry teacher encourages me. |
| PTS5 | 我的化学老师会肯定我的进步。        | My chemistry teacher acknowledges my progress.                                 |

#### Part 3. Questionnaire 2: Chemistry self-efficacy

Response scale for all items: 1 = Strongly disagree; 2 = Disagree; 3 = Neutral; 4 = Agree; 5 = Strongly agree.

| Item | 中文题项                       | English translation                                                                                |
|------|----------------------------|----------------------------------------------------------------------------------------------------|
| CSE1 | 我有信心在化学考试中发挥出色,取得令自己满意的成绩。 | I am confident that I can perform well on chemistry tests and achieve results that satisfy me.     |
| CSE2 | 我有信心化学实验和探究活动中表现出色。        | I am confident that I can perform well in chemistry experiments and inquiry activities.            |
| CSE3 | 我相信我可以掌握化学课程的知识 and 技能。    | I believe that I can master the knowledge and skills taught in chemistry courses.                  |
| CSE4 | 我相信我能在化学考试中取得优异的成绩(或名列前茅)。 | I believe that I can achieve excellent results or rank among the top students in chemistry tests.  |
| CSE5 | 我确信自己能够掌握高中化学课程所要求的知识和技能。  | I am certain that I can master the knowledge and skills required in high school chemistry courses. |

## Part 4. Questionnaire 3: Chemistry identity

Response scale for all items: 1 = Strongly disagree; 2 = Disagree; 3 = Neutral; 4 = Agree; 5 = Strongly agree.

| Dimension                                    | Item | 中文题项                            | English translation                                                                   |
|----------------------------------------------|------|---------------------------------|---------------------------------------------------------------------------------------|
| Chemistry learning competence                | CI1  | 我认为自己在化学课堂上的表现很好                | I think I perform well in chemistry class.                                            |
|                                              | CI2  | 我相信我能够学好化学                      | I believe that I can learn chemistry well.                                            |
|                                              | CI3  | 我能够在化学科目上取得好成绩                  | I can achieve good grades in chemistry.                                               |
|                                              | CI4  | 我能够很好地理解与化学有关的定律和原理             | I can understand chemistry-related laws and principles well.                          |
|                                              | CI5  | 我能运用化学解释日常生活中的自然现象              | I can use chemistry to explain natural phenomena in everyday life.                    |
|                                              | CI6  | 我认为化学是我的强项                      | I consider chemistry to be one of my strengths.                                       |
|                                              | CI7  | 我能够在化学竞赛项目中获得不错的成绩              | I can achieve good results in chemistry competitions.                                 |
|                                              | CI8  | 如果我努力尝试, 我相信即便是化学知识中最难的部分我也能够学会 | If I try hard, I believe that I can learn even the most difficult parts of chemistry. |
| Chemistry classroom interest and performance | CI9  | 我喜欢参与各种与化学有关的活动                 | I enjoy participating in various chemistry-related activities.                        |
|                                              | CI10 | 我能够完成化学作业                       | I can complete my chemistry assignments.                                              |
|                                              | CI11 | 我认为化学课上学到的知识在现实世界中很重要           | I think the knowledge learned in chemistry class is important in the real world.      |
|                                              | CI12 | 我能在实验中熟练地使用工具和操作仪器              | I can skillfully use tools and operate instruments in experiments.                    |
|                                              | CI13 | 我相信我能在化学课上学到很多知识                | I believe that I can learn a lot in chemistry class.                                  |
|                                              | CI14 | 我喜欢化学课上出现的各种化学器材                | I like the various pieces of chemistry equipment used in chemistry class.             |
|                                              | CI15 | 我能顺利地开展一项化学探究活动                 | I can successfully carry out a chemistry inquiry activity.                            |
| Chemistry career interest                    | CI16 | 我有打算在未来从事化学方面的工作                | I plan to work in a chemistry-related field in the future.                            |
|                                              | CI17 | 我喜欢上与化学有关的课                     | I enjoy taking chemistry-related courses.                                             |
|                                              | CI18 | 和从事化学行业的人交谈会让我感到很愉悦             | Talking with people who work in chemistry-related fields makes me feel happy.         |
|                                              | CI19 | 我对那些与化学有关的职业感兴趣                 | I am interested in chemistry-related careers.                                         |
| Chemistry recognition                        | CI20 | 我认为自己是一个精于化学的人                  | I consider myself to be a chemistry person.                                           |
|                                              | CI21 | 同学们认为我是一个精于化学的人                 | My classmates consider me to be a chemistry person.                                   |
|                                              | CI22 | 化学老师认为我是一个精于化学的人                | My chemistry teacher considers me to be a chemistry person.                           |
|                                              | CI23 | 家人和朋友认为我是一个精于化学的人               | My family and friends consider me to be a chemistry person.                           |
